# Supplementary material for: Highly efficient magnesium initiators for lactide polymerization
Source: Royal Society of Chemistry journal article supplement (doi:10.1039/b503134f), 2005-01-01

Supporting information for:

## **Highly Efficient Magnesium Initiators for Lactide Polymerization**

**Jolanta Ejfler, Michał Kobyłka, Lucjan B. Jerzykiewicz and Piotr Sobota\***

*Faculty of Chemistry, University of Wrocław, 14, F. Joliot-Curie, 50-383 Wrocław, Poland*

**Figure 1.**  $^1\text{H}$  NMR spectra (300 MHz) of  $\text{L}^3$  ligand in benzene- $\text{d}_6$  (a), of compound **1** in benzene- $\text{d}_6$  (b), of L-LA living oligomer obtained by **1** and L-LA in toluene- $\text{d}_8$  (c) and purified oligomer in benzene- $\text{d}_6$ (d). The meanings of the distinguished signals are as follows: m – monomer, p – polymer, s – solvent, impurities are denoted by asterix.

(a)

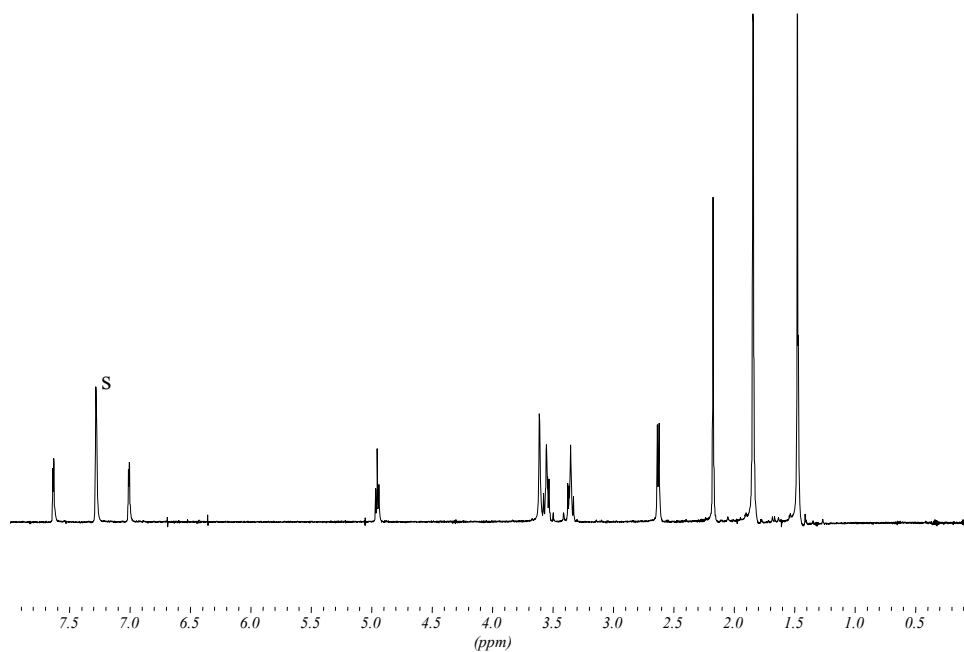

(b)

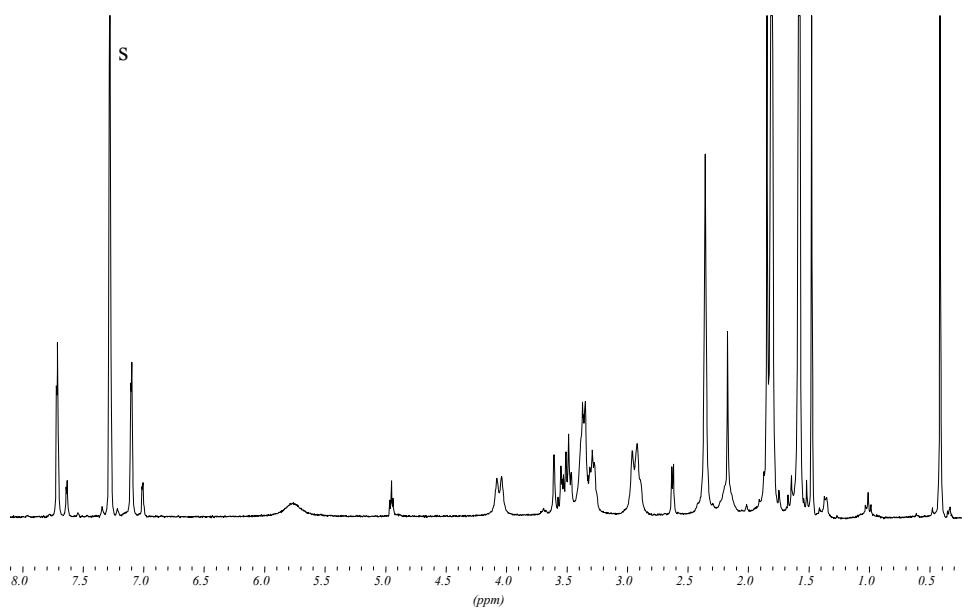

(c)

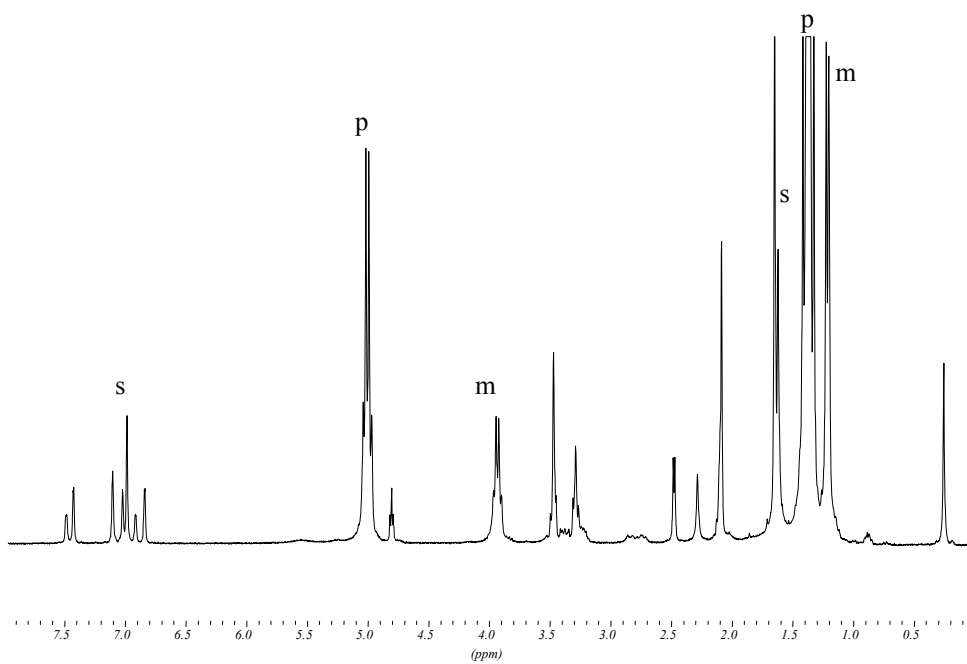

(d)

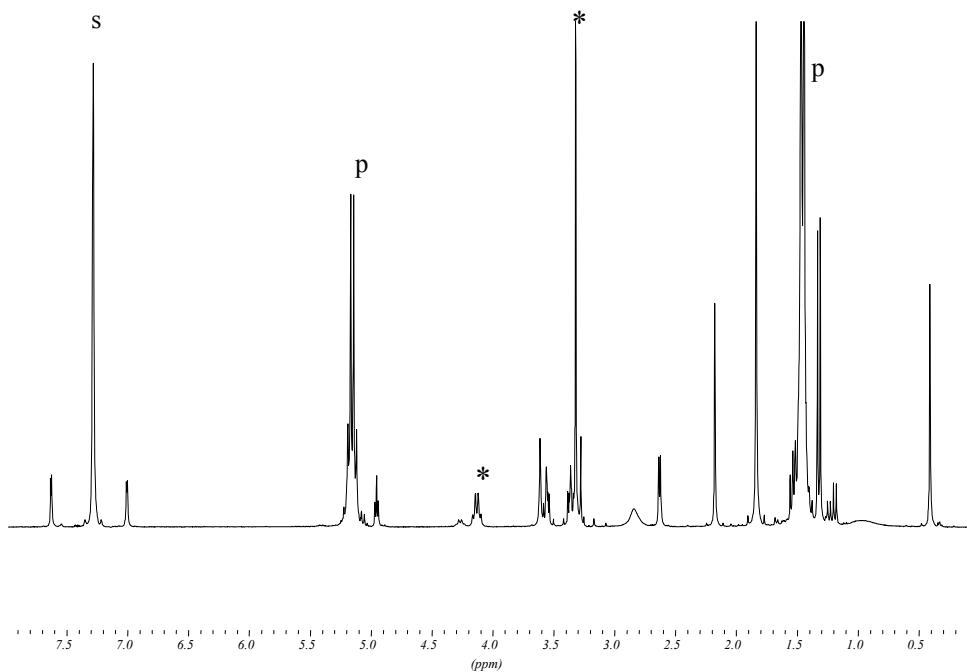

**Figure 2.**  $^1\text{H}$  NMR spectra (300 MHz) of  $\text{L}^2$  ligand in  $\text{CDCl}_3$  (a), of compound **2** in  $\text{CDCl}_3$  (b), of  $\text{L-LA}$  living oligomer obtained by **2** and  $\text{L-LA}$  in toluene- $\text{d}_8$  (c) and purified oligomer in toluene- $\text{d}_8$ (d). The meanings of the distinguished signals are as follows: m – monomer, p – polymer, s – solvent, impurities are denoted by asterix.

(a)

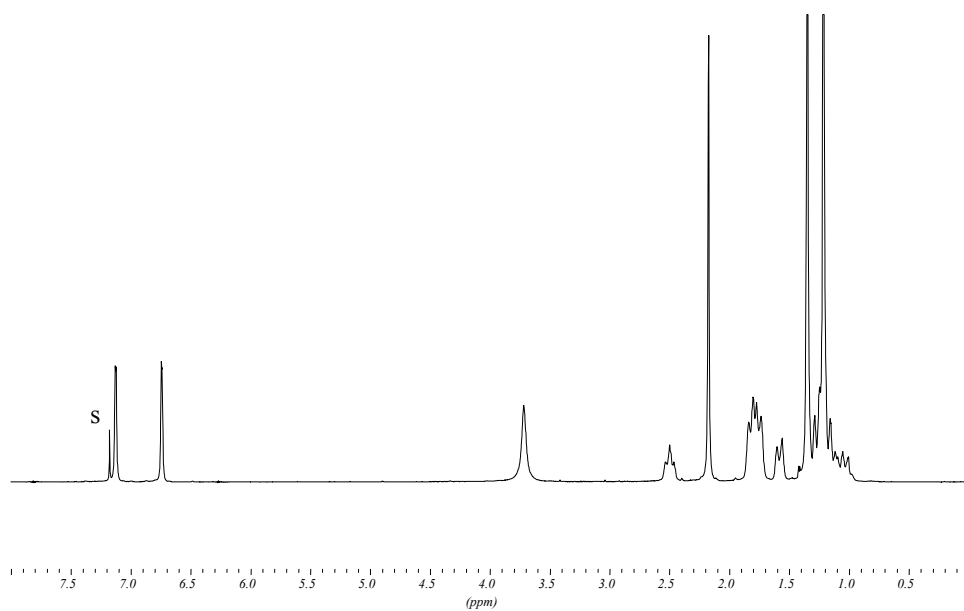

(b)

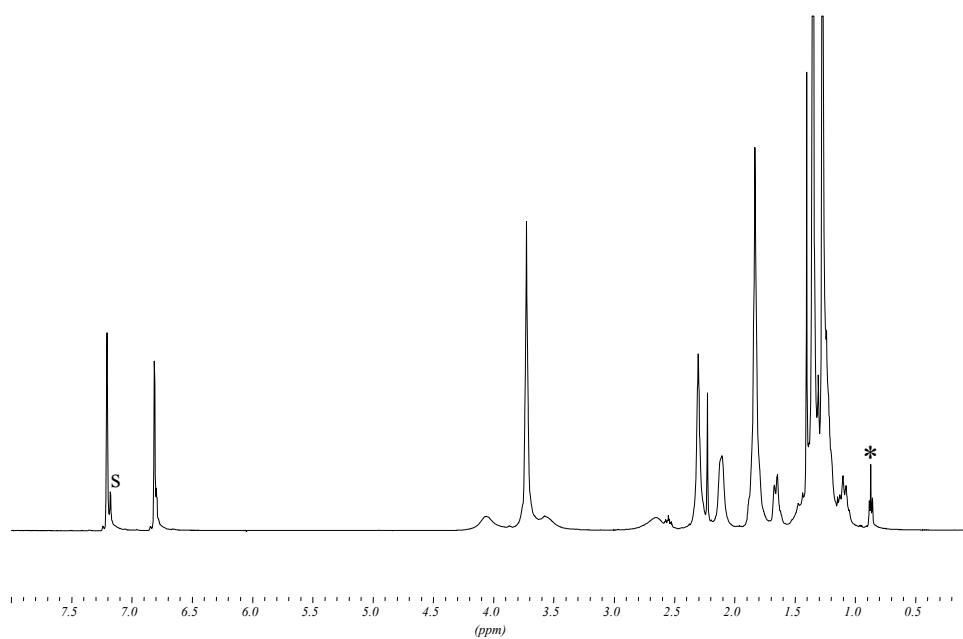

(c)

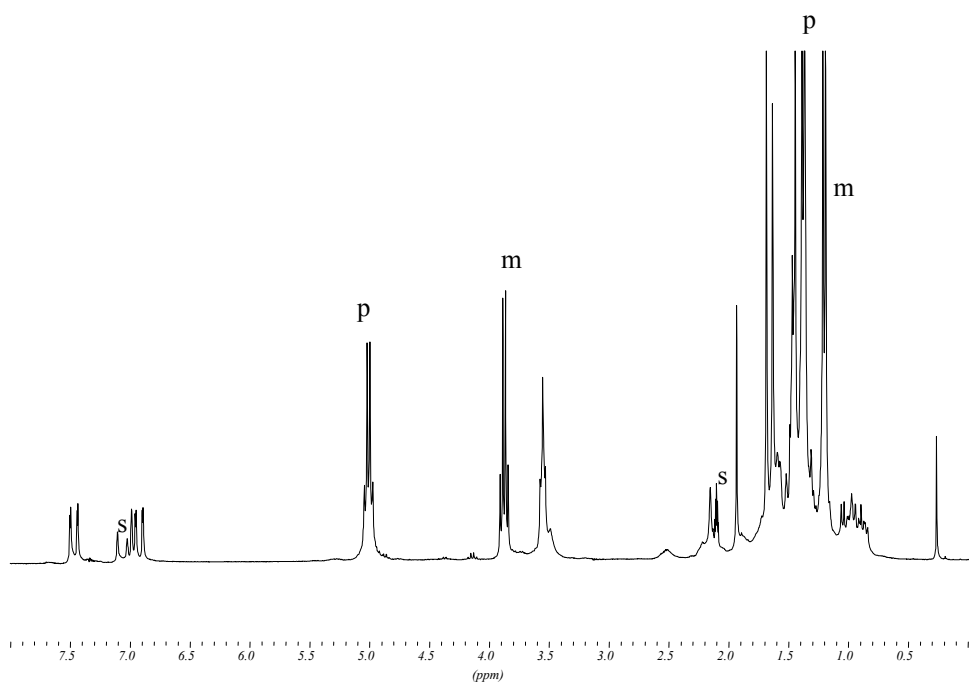

(d)

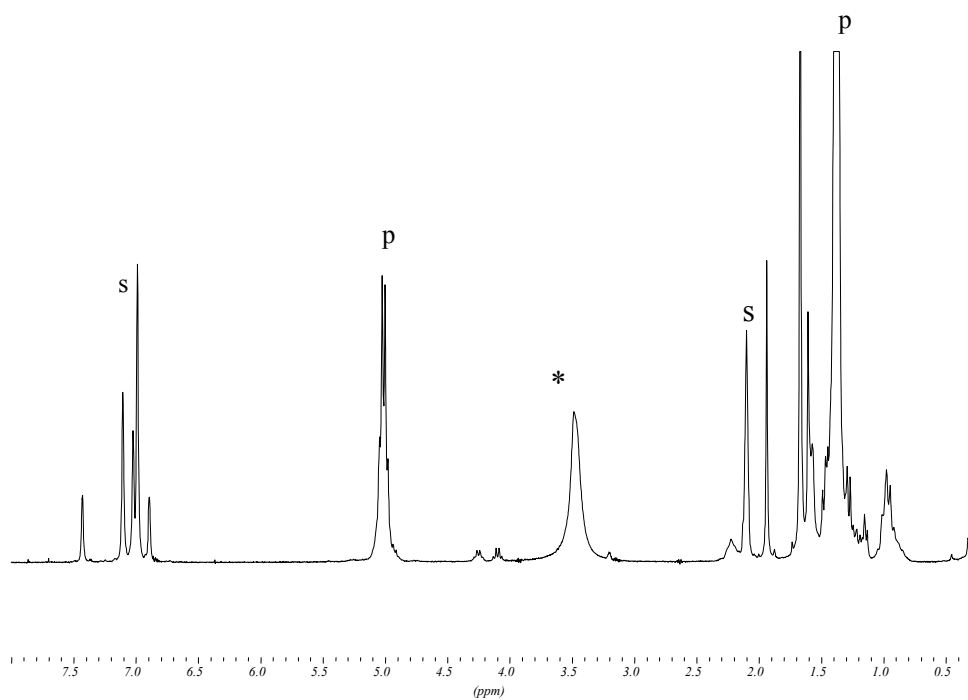

Supplement: b503134f.pdf [file b503134f.pdf]
